# Supplementary material for: Five coordination networks based on zwitterionic ligands: synthesis, crystal structures and optical properties
Source: Royal Society of Chemistry journal article supplement (doi:10.1039/c1ce06052j), 2011-11-11
Supplement: c1ce06052j.pdf [file c1ce06052j.pdf]

## Five coordination networks based on zwitterionic ligands: synthesis, crystal structures and optical properties

Guo-Qiang Kong<sup>a</sup> and Chuan-De Wu<sup>\*a,b</sup>

<sup>a</sup> Department of Chemistry, Zhejiang University, Hangzhou, 310027, P. R. China

<sup>b</sup> State Key Laboratory of Structural Chemistry, Chinese Academy of Sciences, Fuzhou, 350002, P. R. China

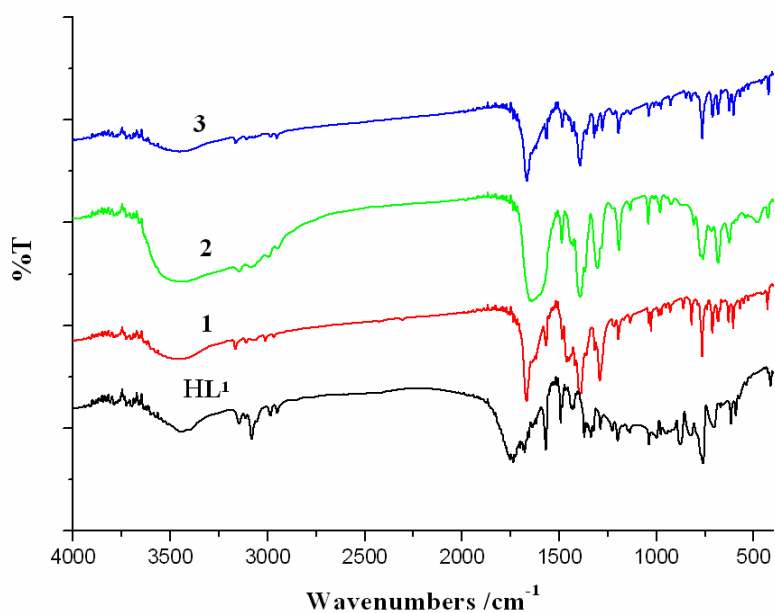

Fig. S1. FT-IR spectra of HL<sup>1</sup>, 1, 2 and 3.

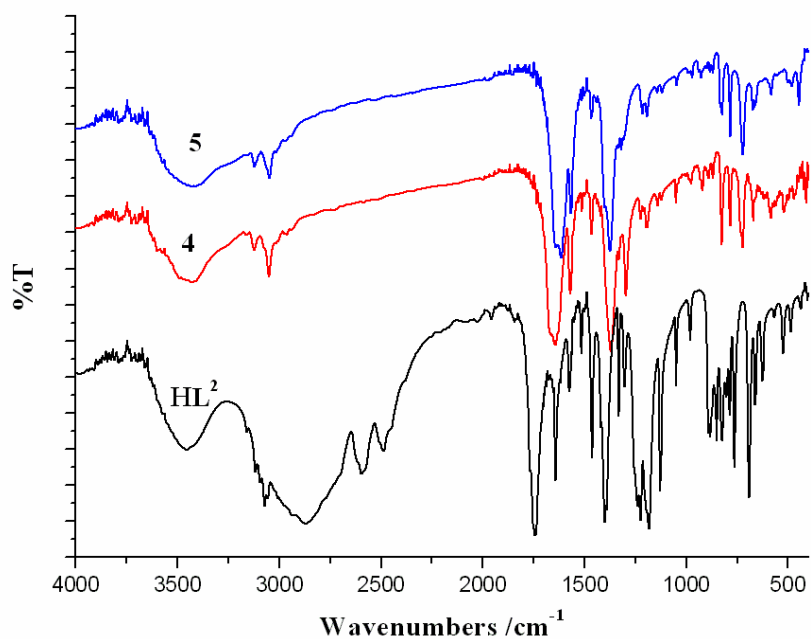

Fig. S2. FT-IR spectra of HL<sup>2</sup>, 4 and 5.

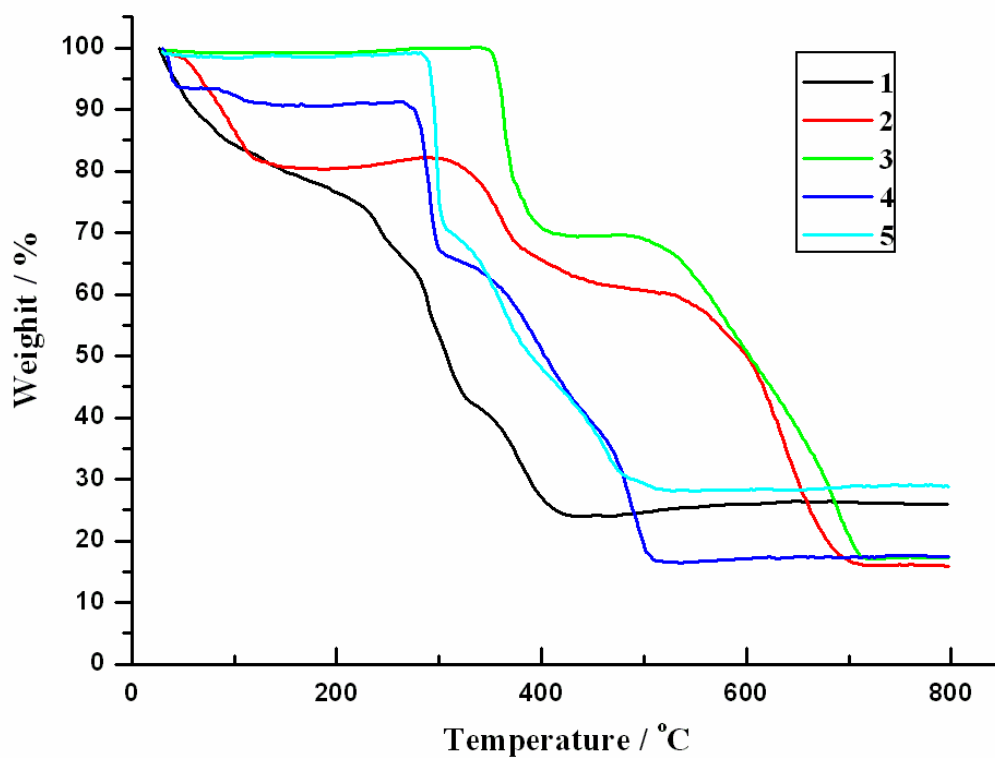

**Fig. S3.** TGA charts for compounds **1** to **5**.

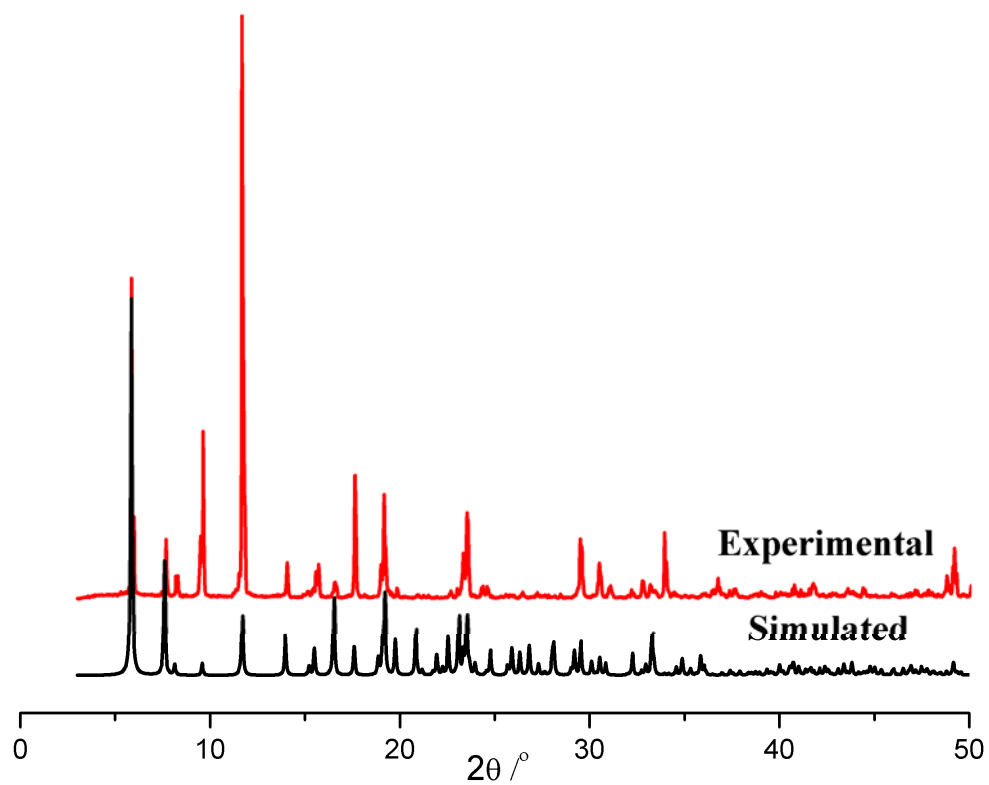

**Fig. S4.** Powder X-ray diffraction patterns for **1**.

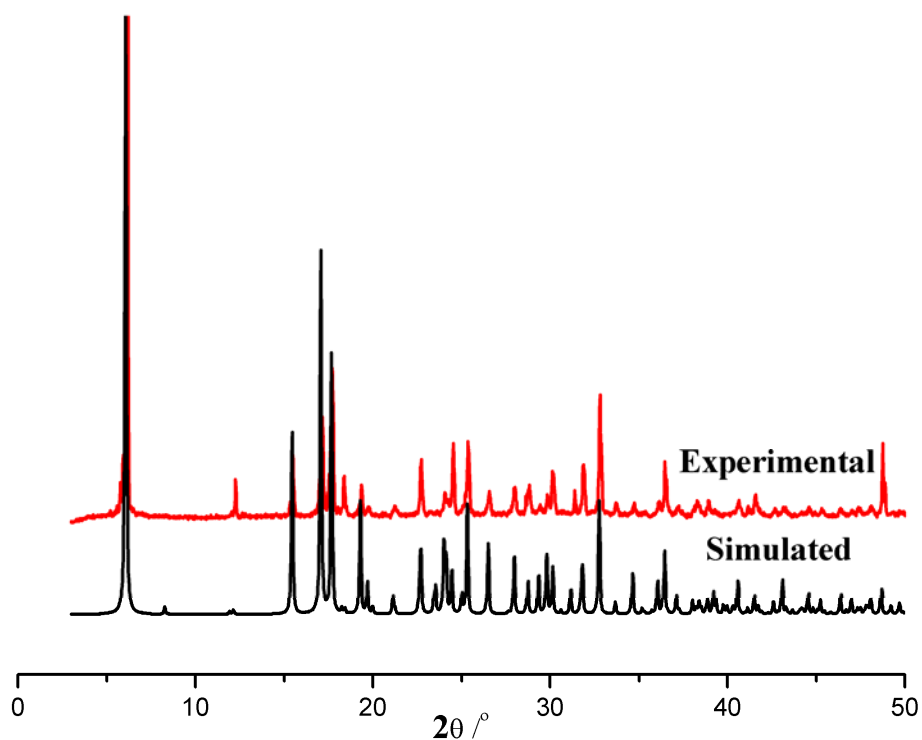

**Fig. S5.** Powder X-ray diffraction patterns for **2**.

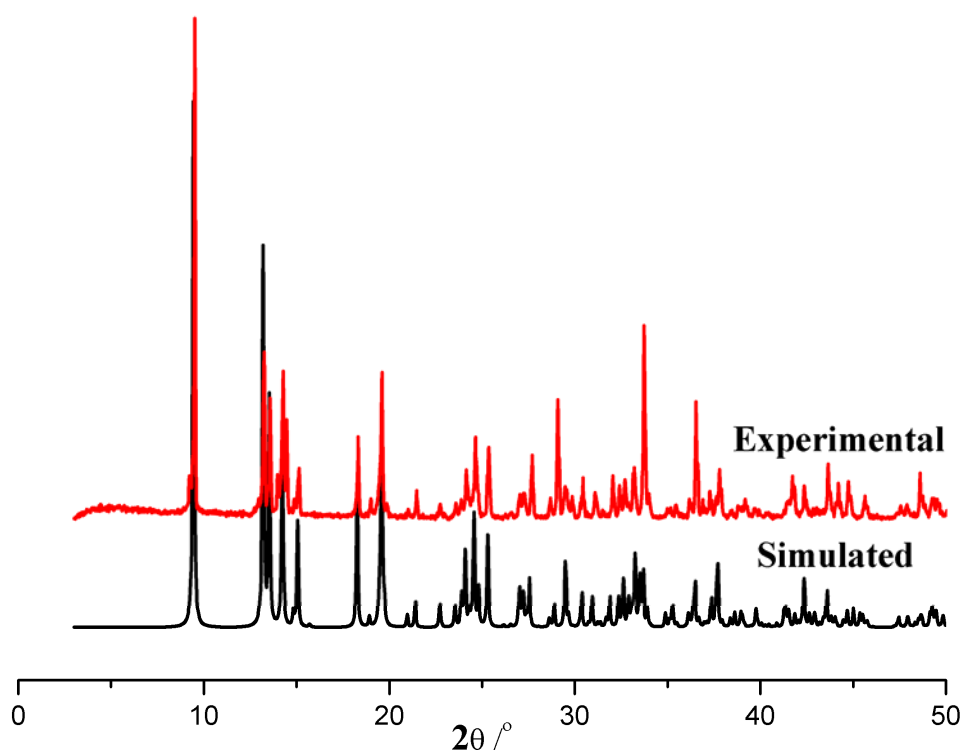

**Fig. S6.** Powder X-ray diffraction patterns for **3**.

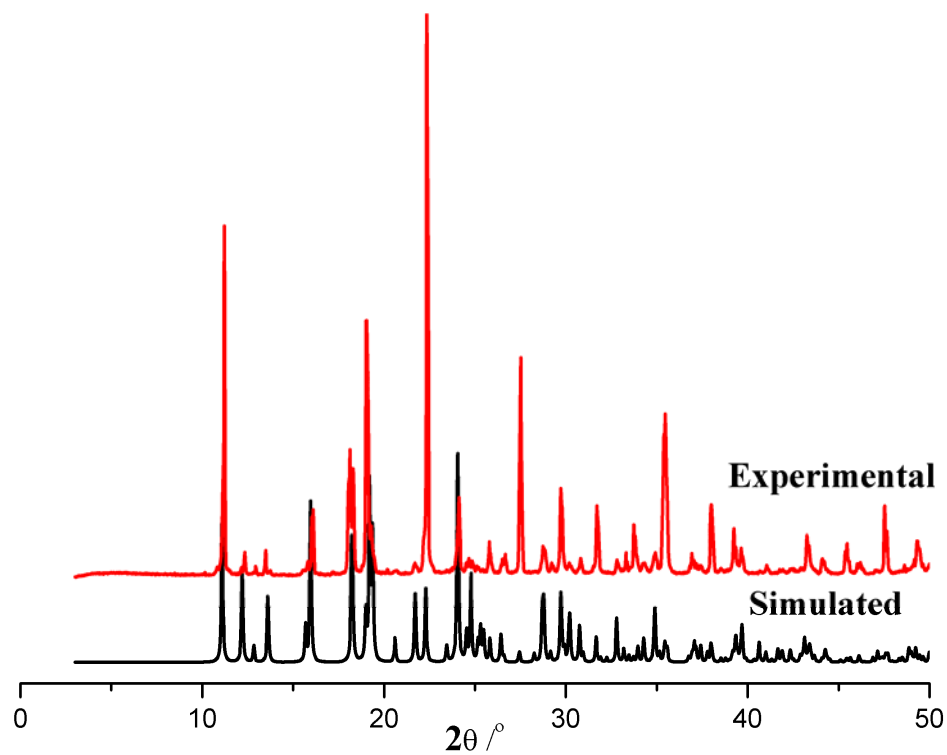

**Fig. S7.** Powder X-ray diffraction patterns for 4.

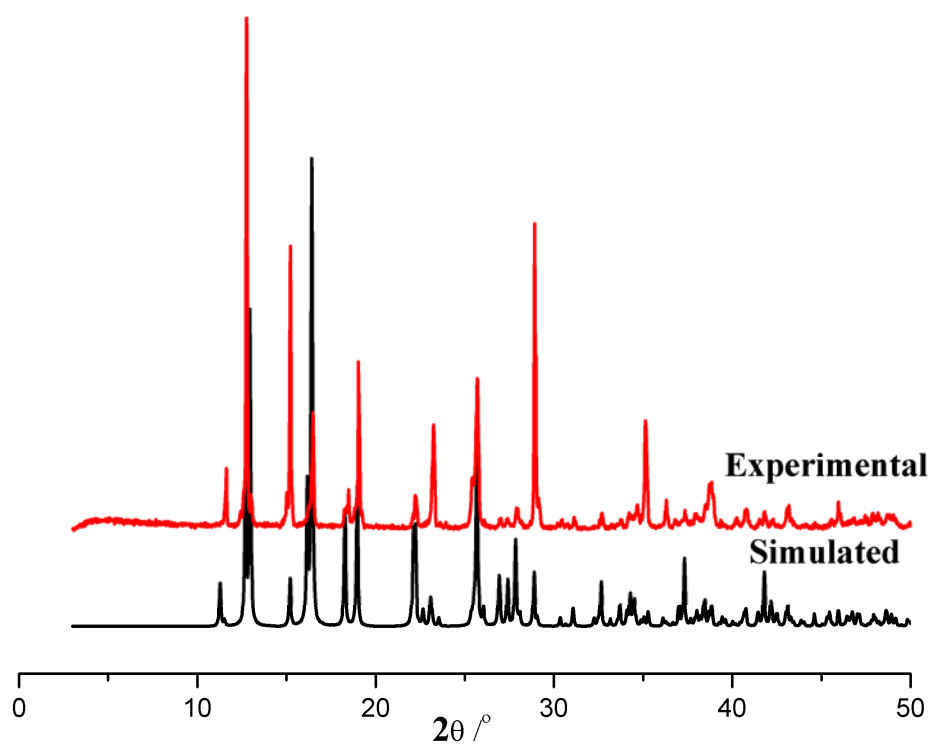

**Fig. S8.** Powder X-ray diffraction patterns for 5.
